# Supplementary material for: Extractive electrospray ionization mass spectrometry of ionic liquids
Source: Royal Society of Chemistry journal article supplement (doi:10.1039/c4ay00835a), 2014-01-01
Supplement: c4ay00835a1.pdf [file c4ay00835a1.pdf]

1 **Supplementary Information**

2

3 **Extractive Electrospray Ionization Mass Spectrometry of Ionic Liquids**

4

5 Yafei Zhou, Konstantin Chingin, Shuiping Yang, Saijin Xiao, Liang Zhu, Huanwen Chen\*

6

7 Jiangxi Key Laboratory for Mass Spectrometry and Instrumentation, East China Institute of  
8 Technology Nanchang 330013 China

9

Address reprints to:

Dr. Huanwen Chen

E-mail: [chw8868@gmail.com](mailto:chw8868@gmail.com).

Room 804, Sci. & Tech. Building, 418 Guanglan Road, Nanchang City, Jiangxi Province 330013, China

Tel: (+86)791-8387-9275; Fax: (+86)791-8389-6370.

10

11

## 12 Figures and Tables

13

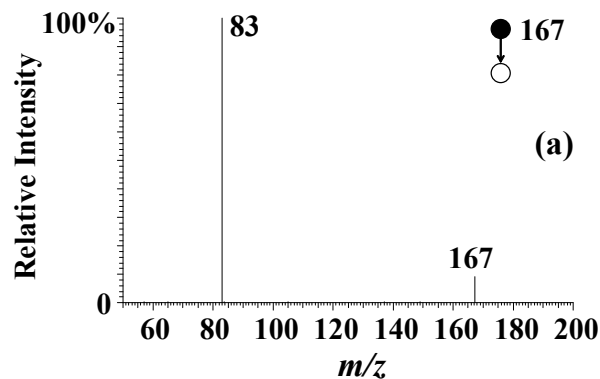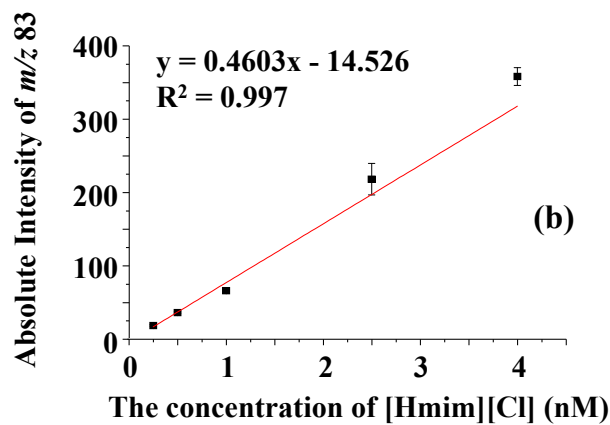

14

15 **Figure S-1:** (a) EESI-MS/MS analysis of isolated Hmim<sup>+</sup> cation (*m/z* 167) from [Hmim][Cl] ionic liquid;  
16 (b) signal intensity of the fragment ion at *m/z* 83 as a function of [Hmim][Cl] concentration. We did not  
17 study linearity in a broader range using the experimental configuration in Figure 1a, because sampling of  
18 high-concentration ILs resulted in chemical contamination of the instrument.

19

20

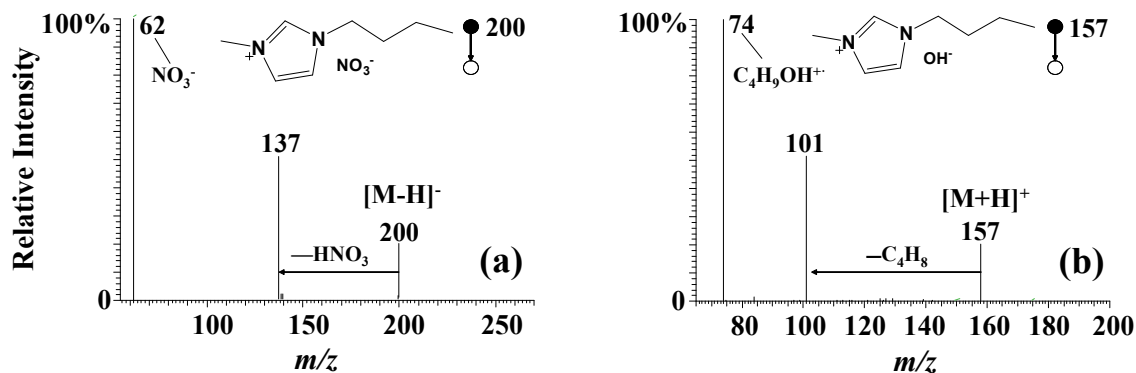

21

22 **Figure S-2:** (a) The precursor ions at  $m/z$  200 observed in EESI(-) of [Bmim][NO<sub>3</sub>] in methanol  
 23 dissociate via the loss of NO<sub>3</sub> anions ( $m/z$  62) as well as the neutral loss of HNO<sub>3</sub> ( $m/z$  137). The  
 24 net negative charge of [Bmim][NO<sub>3</sub>] complex results from the deprotonation of Bmim cation,  
 25 which is quite likely given its acidic nature (Cui, X., Zhang, S., Shi, F., Zhang, Q., Ma, X., Lu, L.,  
 26 Deng, Y.: The influence of the acidity of ionic liquids on catalysis. *ChemSusChem*. 3(9), 1043-  
 27 1047, 2010). (b) MS/MS analysis of a protonated [CA+H]<sup>+</sup> complex ( $m/z$  157) observed for the  
 28 more basic [Bmim][OH] IL in which protonation is likely to occur at OH<sup>-</sup> anion. The neutral loss  
 29 of 56 u fragment (C<sub>4</sub>H<sub>8</sub>) was observed ( $m/z$  101), characteristic for Bmim fragmentation. The  
 30 other fragment at  $m/z$  74 is tentatively assigned to C<sub>4</sub>H<sub>9</sub>OH<sup>+</sup> ions.

31

32

33

34

35

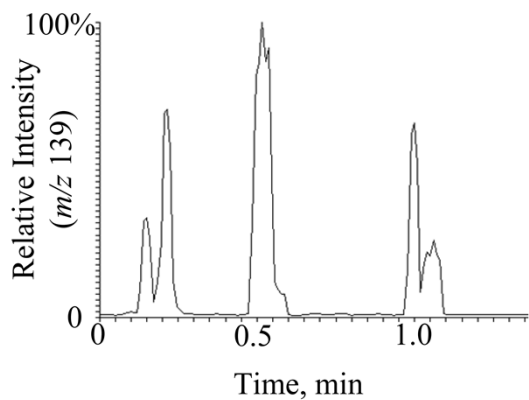

36

37 **Figure S-3:** Single-ion chromatogram of Bmim signal at  $m/z$  139 during the EESI-MS analysis  
38 of [Bmim][BF<sub>4</sub>] using the ‘droplet’ configuration (Figure 1b). Three successive samplings are  
39 shown. IL signals, e.g., C<sup>+</sup> or A<sup>-</sup>, rapidly increased when the loaded pipette tip was brought in  
40 front of the neutral spray followed by the rapid signal decrease to the background level when the  
41 pipette was removed. Instability of the peak shape is attributed to hand sampling.

42

43

44

45

46

47

48

49

50

51

52

53 **Table S-1:** The observation of protonated and deprotonated CA complexes for different ILs by  
 54 EESI-MS in correlation with their acid-base properties. CA signals are marked as +++, ++ or +,  
 55 depending on their intensity: “+” = LTQ intensity < 10<sup>2</sup>; “++” = LTQ intensity between 10<sup>2</sup>-10<sup>3</sup>;  
 56 “+++” = LTQ intensity > 10<sup>3</sup>. Non-observed signals are marked as —.

| <b>ILs</b>                | <b>Acid-base properties</b> | <b>CA+H</b> | <b>CA-H</b> |
|---------------------------|-----------------------------|-------------|-------------|
| [Bmim][OH]                | Basic                       | +++         | —           |
| [Omim][OH]                | Basic                       | +++         | —           |
| [Bmim][PF <sub>6</sub> ]  | Weak basic                  | +++         | ++          |
| [Aemim][PF <sub>6</sub> ] | Weak basic                  | +++         | +           |
| [Bmim][Ac]                | Weak basic                  | ++          | +           |
| [Bmim][NO <sub>3</sub> ]  | Weak acidic                 | —           | +++         |
| [Emim][HSO <sub>4</sub> ] | Acidic                      | —           | —           |
| [Bmim][HSO <sub>4</sub> ] | Acidic                      | —           | —           |
| [BuPy][BF <sub>4</sub> ]  | Acidic                      | —           | —           |
| [Bmim][Cl]                | Neutral                     | —           | —           |

57
